# Supplementary material
Source: PubMed Central journal article supplement (PMC3811312)
Supplement: AAC.01590-13_zac011132321so1.pdf [file AAC.01590-13_zac011132321so1.pdf]

### Supplemental Figure 1.

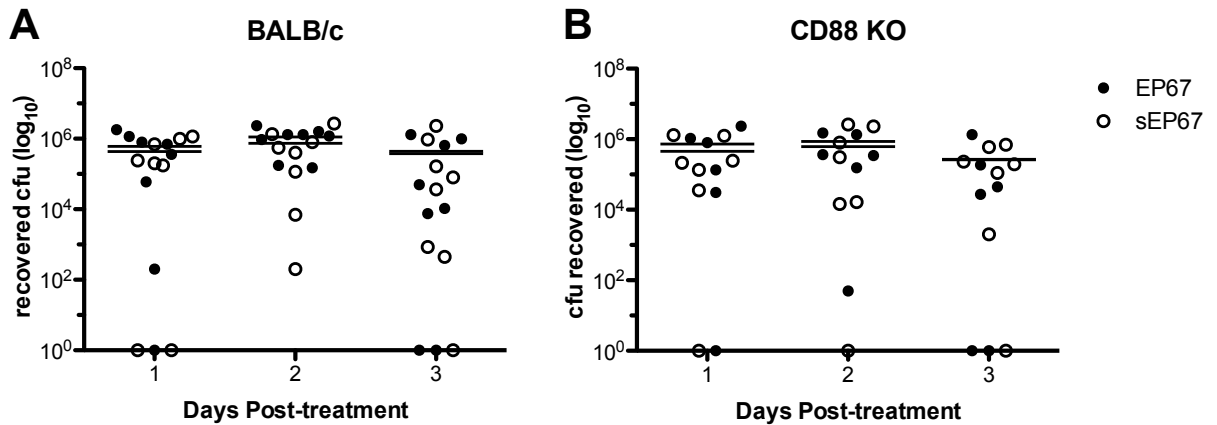

**Supplemental Figure 1. EP67 treatment does not impact colonization of murine native vaginal flora *Enterococcus in vivo*.** Approximately  $1 \times 10^7$  cfu GBS was inoculated into the vaginal lumen of 8-week-old BALB/c mice (n = 8 per group). GBS was allowed to establish colonization for 48 hours prior to initial treatment with EP67 or sEP67. During GBS colonization and EP67 or sEP67 treatment, native *Enterococcus* was monitored by swabbing the vagina and enumerating recovered bacteria. (B) Same experiment protocol from (A) utilizing CD88 KO mice (n = 10 per group). Mice in which *Enterococcus* were not isolated were excluded from the data set.
